# Supplementary material
Source: MDPI journal article supplement (https://www.mdpi.com/2673-7159/4/1/1)
Supplement: s1 [file s1]

## Supplementary Contextual Information for the Harku Municipality Satisfaction Survey - Demographic information -

The survey, conducted as an online survey (CAWI) from December 2nd to December 12th, 2022, gathered responses from 1,804 residents of Harku municipality. Invitations to participate were extended to all residents aged 16 and above, using email addresses registered in the population register (11,218 contacts). The distribution of respondents across settlements and cantons was proportional to the total population [1].

Table S1. Demographic Profile of the Respondents

| Demographic Information                   | Percentage |
|-------------------------------------------|------------|
| <b>Relationship to Harku</b>              |            |
| Employed                                  | 13%        |
| Student                                   | 1%         |
| Spends Most Free Time                     | 60%        |
| Place of Residence                        | 30%        |
| <b>Years Residing in the Municipality</b> |            |
| Up to 5 years                             | 27%        |
| 6-15 years                                | 28%        |
| 16 years and more                         | 45%        |
| <b>Gender</b>                             |            |
| Male                                      | 40%        |
| Female                                    | 60%        |
| <b>Age</b>                                |            |
| Up to 24                                  | 4%         |
| 25-39                                     | 27%        |
| 40-54                                     | 40%        |
| 55-64                                     | 17%        |
| 65 and older                              | 12%        |
| <b>Mother Tongue</b>                      |            |
| Estonian                                  | 88%        |
| Russian                                   | 12%        |
| <b>Education</b>                          |            |
| Basic Education                           | 3%         |
| Secondary Education                       | 36%        |
| Higher Education                          | 61%        |
| <b>Main Occupation</b>                    |            |
| Self-employed                             | 16%        |
| Manager                                   | 17%        |
| Specialist, Official, or Clerk            | 38%        |
| Manual Worker                             | 10%        |
| Student                                   | 3%         |
| Homemaker, Unemployed                     | 6%         |
| Retiree                                   | 10%        |
| <b>Children</b>                           |            |

|                                            |     |
|--------------------------------------------|-----|
| Yes                                        | 49% |
| No                                         | 51% |
| <b>Net Income per Household Member</b>     |     |
| Up to 1000 euros                           | 27% |
| 1001-1500 euros                            | 19% |
| 1501-2000 euros                            | 14% |
| Over 2000 euros                            | 19% |
| Don't Know/Not Disclosed                   | 21% |
| <b>Main Commute Mode to Work or School</b> |     |
| Car                                        | 69% |
| Bus                                        | 8%  |
| Bicycle                                    | 1%  |
| Work from Home                             | 3%  |
| Walk                                       | 2%  |
| Use Both Car and Public Transport          | 12% |
| Not Working/Not Studying                   | 5%  |

Table S2. Distribution of Respondents by Districts (Villages/Towns)

| District            | Village/Town | Percentage | Total |
|---------------------|--------------|------------|-------|
| Tabasalu-Rannamõisa | Tabasalu     | 20%        | 29%   |
|                     | Sõrve        | 2%         |       |
|                     | Rannamõisa   | 5%         |       |
|                     | Ilmandu      | 2%         |       |
| Harkujärve-Tiskre   | Harkujärve   | 5%         | 18%   |
|                     | Tiskre       | 13%        |       |
|                     | Laabi        | 0%         |       |
| Vääna-Jõesuu        | Vääna-Jõesuu | 7%         | 12%   |
|                     | Viti         | 4%         |       |
|                     | Naage        | 1%         |       |
| Muraste             | Muraste      | 10%        | 10%   |
|                     | Meriküla     | 0%         |       |
| Vääna               | Liikva       | 4%         | 8%    |
|                     | Vääna        | 2%         |       |
|                     | Vahi         | 1%         |       |
|                     | Vaila        | 1%         |       |
|                     | Humala       | 0%         |       |
| Suurupi             | Suurupi      | 8%         | 8%    |
| Türisalu            | Türisalu     | 5%         | 6%    |
|                     | Adra         | 1%         |       |
| Harku               | Harku        | 5%         | 5%    |
| Kumna-Tutermaa      | Kumna        | 1%         | 3%    |
|                     | Tutermaa     | 2%         |       |
|                     | Kütke        | 0%         |       |

1. Uuringud - Uudised Ja Teated - Harku Vallavalitsus Available online: [https://www.harku.ee/uudised-ja-teated/-/asset\\_publisher/7WOcbaKfFguz/content/uuringud](https://www.harku.ee/uudised-ja-teated/-/asset_publisher/7WOcbaKfFguz/content/uuringud) (accessed on 6 December 2023).
