# Supplementary material
Source: MDPI journal article supplement (https://www.mdpi.com/2673-7159/4/1/1)

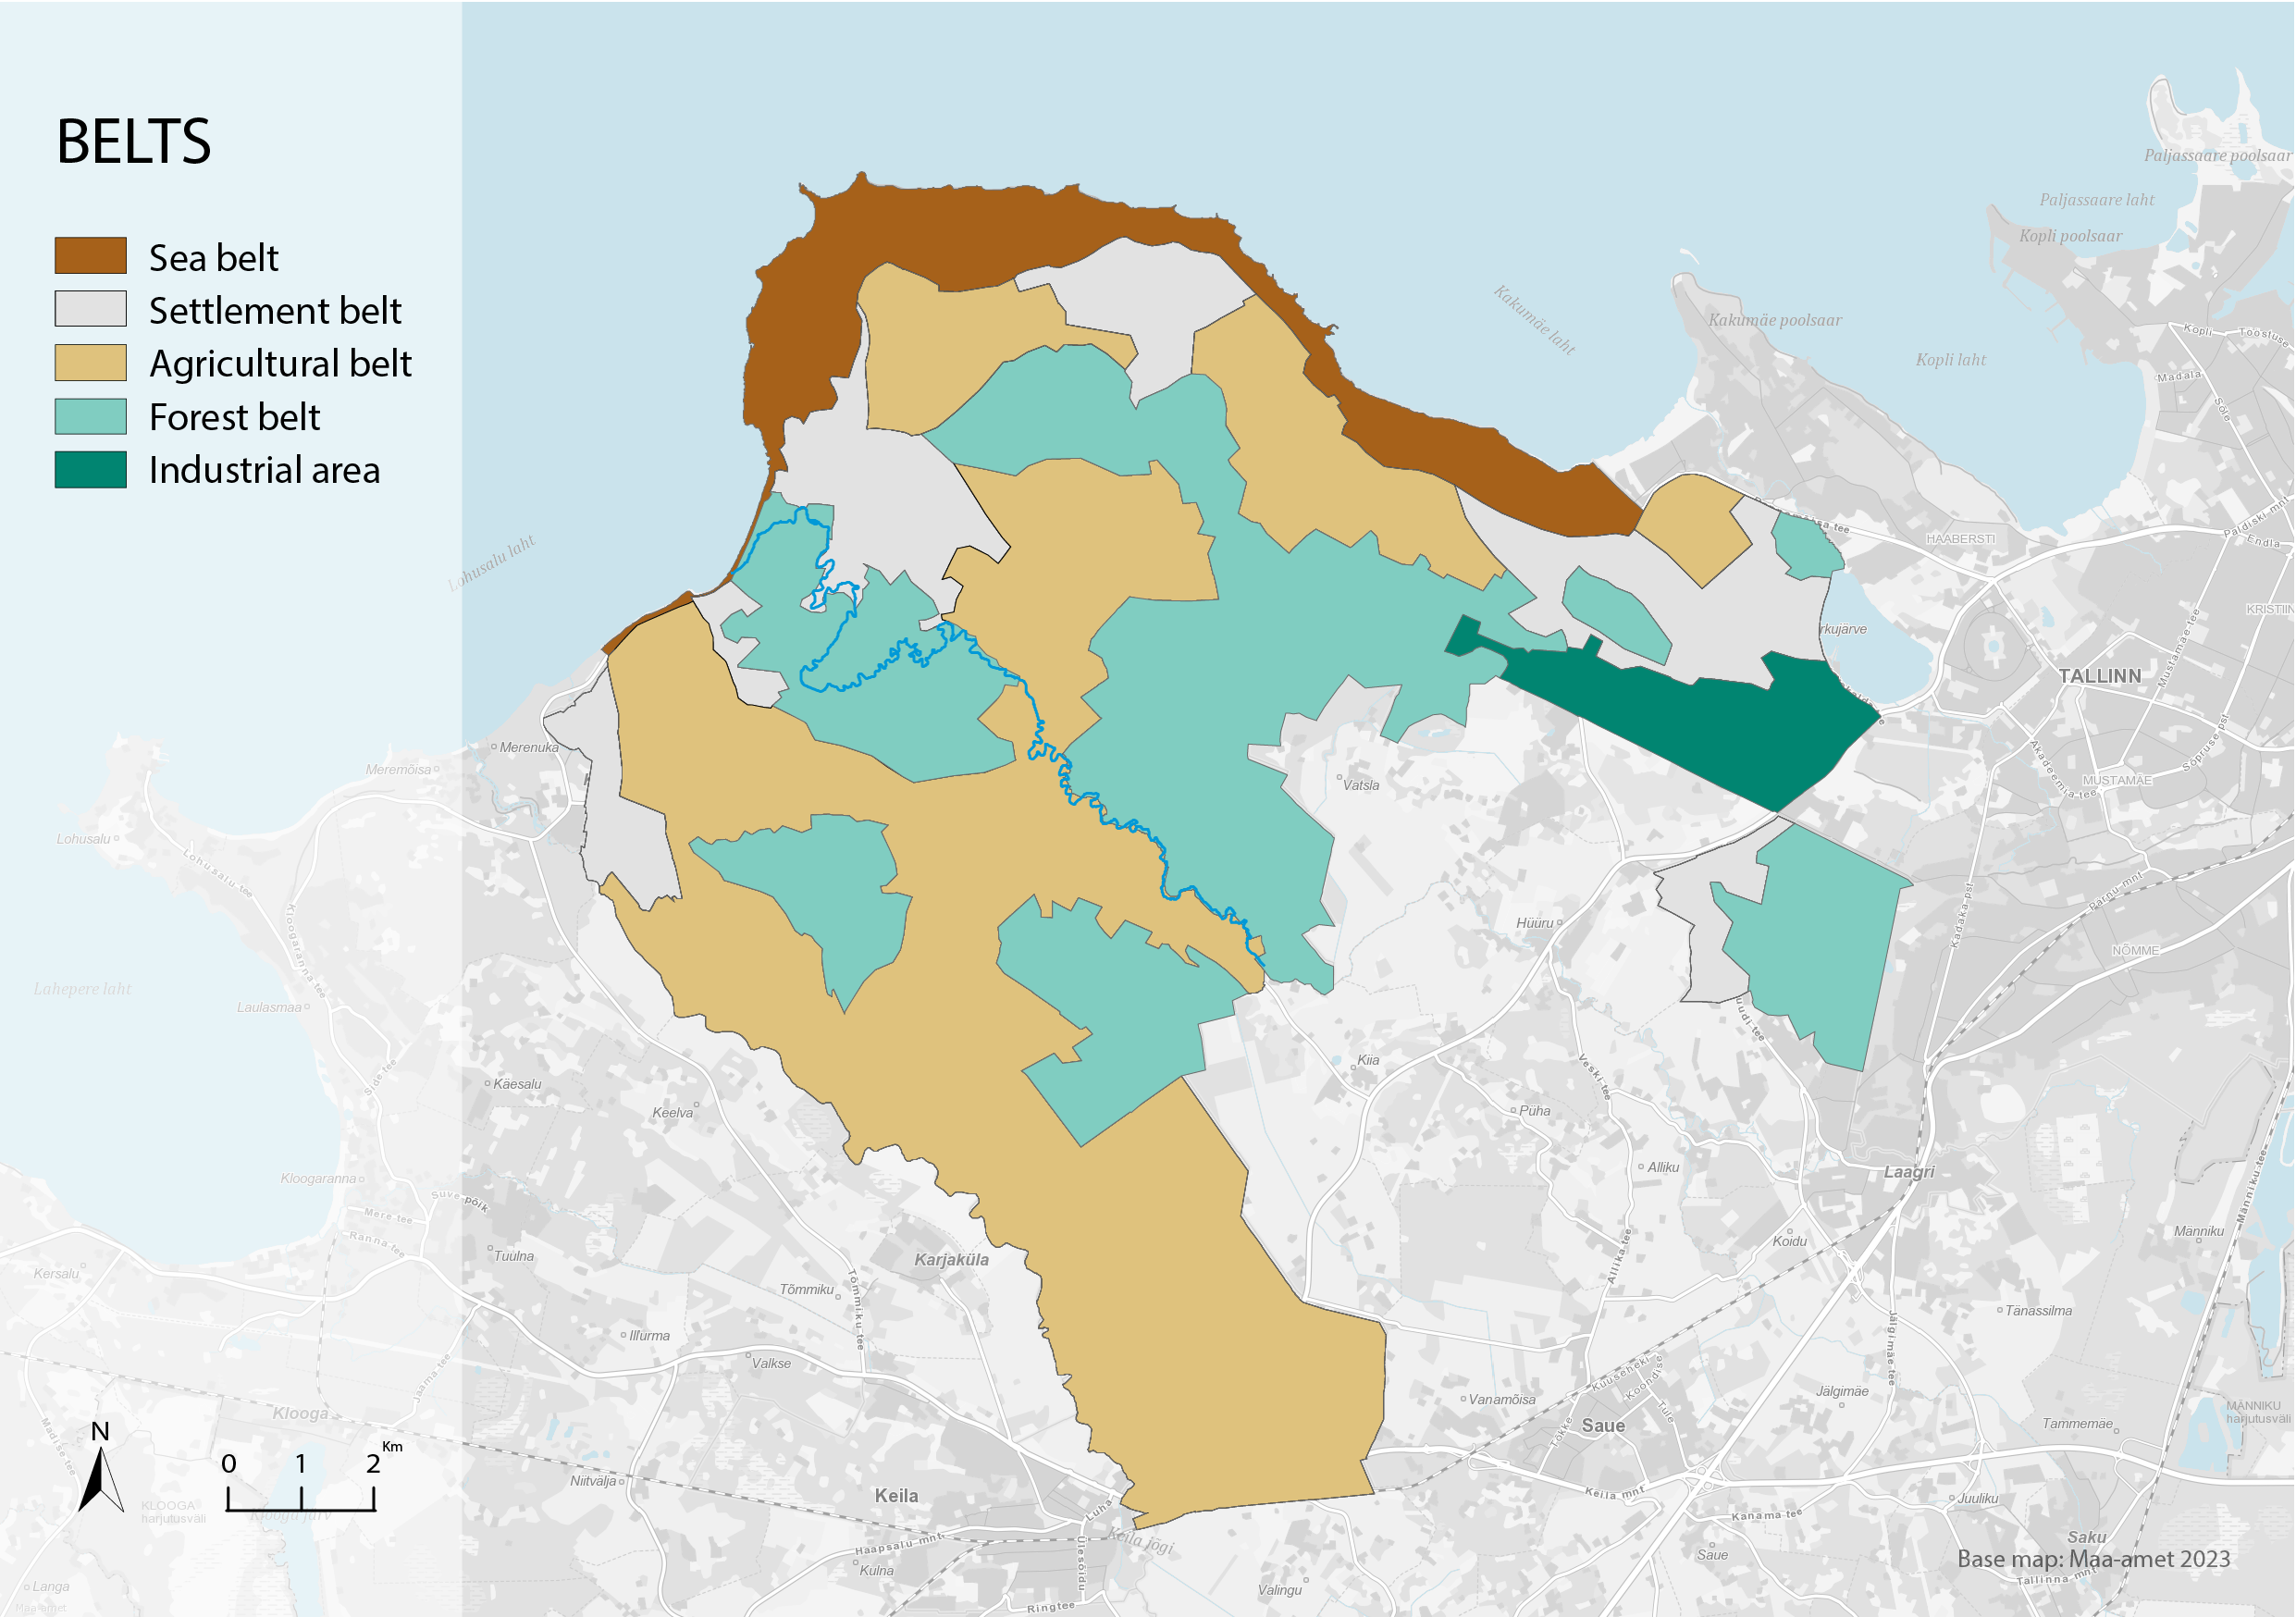

Supplement: s1 [file s1 › S1.png]
